# Supplementary material for: CTXφ Replication Depends on the Histone-Like HU Protein and the UvrD Helicase
Source: PubMed Central journal article supplement (PMC4439123; doi:10.1371/journal.pgen.1005256), 2015-05-20

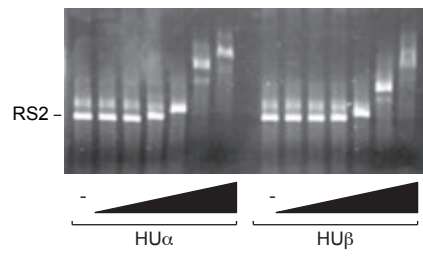

Supplement: pgen.1005256.s002.pdf [file pgen.1005256.s002.pdf]
